# Supplementary material
Source: Springer Nature journal article supplement (https://www.springermedizin.de/resource/supplementary/12936_2006_249_MOESM1_ESM.pdf/9547300)

M no/no no/in no/in no/in b a b c b M  
 Co Pr Po Co Pr Po Co Pr Po Co Pr Po

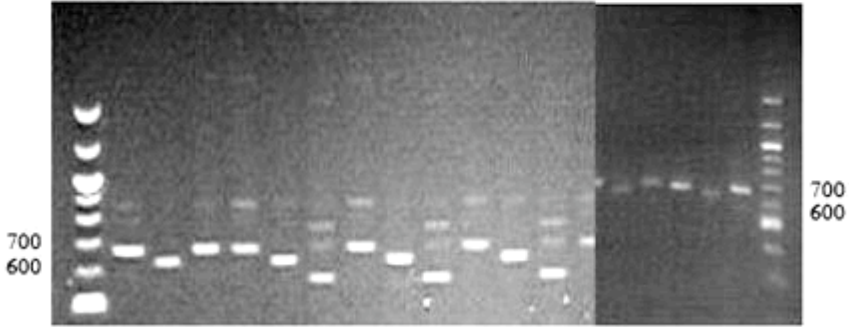

Supplement: MOESM1 [file 9547300]
